# Supplementary material
Source: publisher site journal article supplement (https://www.e-cmh.org/upload/media/cmh-2022-0330-Supplementary-1.pdf)
Supplement: Supplementary file 1 [file cmh-2022-0330-Supplementary-1.pdf]

**Supplementary Material 1.** Search strategies

| PubMed                                                                                                                                                                                                                                                                                                                                                                                                                                                                                                                                                                                                                                                                                                                                                                                                             | Embase                                                                                                                                                                                                                                                                                                                                                                                                                                                                                                                                                                                                                                                                                                                                                                                                                                                                                                                                                                                                                                                                                                                                                                                                                                                                                                                                                                                                                                                                                                                                                                                                                                                                                                                                                                                                                                                                                                                                                                                                                                                                                                                                                                                                                                                                                                                                                                                                                                                                                                                                                                                                                                                                                                                                                                                                                                                                                                                                                                                                                               |
|--------------------------------------------------------------------------------------------------------------------------------------------------------------------------------------------------------------------------------------------------------------------------------------------------------------------------------------------------------------------------------------------------------------------------------------------------------------------------------------------------------------------------------------------------------------------------------------------------------------------------------------------------------------------------------------------------------------------------------------------------------------------------------------------------------------------|--------------------------------------------------------------------------------------------------------------------------------------------------------------------------------------------------------------------------------------------------------------------------------------------------------------------------------------------------------------------------------------------------------------------------------------------------------------------------------------------------------------------------------------------------------------------------------------------------------------------------------------------------------------------------------------------------------------------------------------------------------------------------------------------------------------------------------------------------------------------------------------------------------------------------------------------------------------------------------------------------------------------------------------------------------------------------------------------------------------------------------------------------------------------------------------------------------------------------------------------------------------------------------------------------------------------------------------------------------------------------------------------------------------------------------------------------------------------------------------------------------------------------------------------------------------------------------------------------------------------------------------------------------------------------------------------------------------------------------------------------------------------------------------------------------------------------------------------------------------------------------------------------------------------------------------------------------------------------------------------------------------------------------------------------------------------------------------------------------------------------------------------------------------------------------------------------------------------------------------------------------------------------------------------------------------------------------------------------------------------------------------------------------------------------------------------------------------------------------------------------------------------------------------------------------------------------------------------------------------------------------------------------------------------------------------------------------------------------------------------------------------------------------------------------------------------------------------------------------------------------------------------------------------------------------------------------------------------------------------------------------------------------------------|
| <p>#1<br/>((((("non-alcoholic" [tw] or "non alcoholic" [tw] or nonalcoholic [tw]) AND (fatty[tw] or steato*[tw])) OR (NAFLD [tw] or NASH [tw] or fibrosis [tw])) OR (Non-alcoholic Fatty Liver Disease [mesh])) and (glucagon like peptide 1 receptor agonist OR GLP-1 receptor agonist OR albiglutide OR dulaglutide OR liraglutide OR lixisenatide OR Exenatide OR Semaglutide OR thiazolidinedione OR pioglitazone OR rivoglitazone OR rosiglitazone OR lobe-glitazone OR Hypoglycemic Agents [mesh]) AND (randomizedcontrolledtrial[Filter]).</p>                                                                                                                                                                                                                                                              | <p>'nonalcoholic fatty liver'/exp OR 'nafld (nonalcoholic fatty liver disease)' OR 'non alcoholic fatty liver disease' OR 'non alcoholic hepato-steatosis' OR 'non alcoholic hepatosteatosis' OR 'non alcoholic liver steatosis' OR 'non-alcoholic fatty liver' OR 'non-alcoholic fld' OR 'non-alcoholic fatty liver' OR 'non-alcoholic fatty liver disease' OR 'non-alcoholic hepatic steatosis' OR 'nonalcoholic fld' OR 'nonalcoholic fatty liver' OR 'nonalcoholic fatty liver disease' OR 'nonalcoholic hepatic steatosis' OR 'nonalcoholic hepatosteatosis' OR 'nonalcoholic liver steatosis'</p>                                                                                                                                                                                                                                                                                                                                                                                                                                                                                                                                                                                                                                                                                                                                                                                                                                                                                                                                                                                                                                                                                                                                                                                                                                                                                                                                                                                                                                                                                                                                                                                                                                                                                                                                                                                                                                                                                                                                                                                                                                                                                                                                                                                                                                                                                                                                                                                                                              |
| <p>#2<br/>'glucagon like peptide 1 receptor agonist'/exp OR 'glitazone derivative'/exp</p>                                                                                                                                                                                                                                                                                                                                                                                                                                                                                                                                                                                                                                                                                                                         | <p>'glucagon like peptide 1 receptor agonist'/exp OR 'glitazone derivative'/exp</p>                                                                                                                                                                                                                                                                                                                                                                                                                                                                                                                                                                                                                                                                                                                                                                                                                                                                                                                                                                                                                                                                                                                                                                                                                                                                                                                                                                                                                                                                                                                                                                                                                                                                                                                                                                                                                                                                                                                                                                                                                                                                                                                                                                                                                                                                                                                                                                                                                                                                                                                                                                                                                                                                                                                                                                                                                                                                                                                                                  |
| <p>#3<br/>(((TS=((liver) AND ("non-alcoholic" or "non alcoholic" or nonalcoholic) AND (fatty or steato*)) OR (NAFLD or NASH or fibrosis) OR ("Non-alcoholic Fatty Liver Disease")) AND TS= ("glucagon like peptide 1 receptor agonist" OR "GLP-1 receptor agonist" OR albiglutide OR dulaglutide OR liraglutide OR lixisenatide OR Exenatide OR Semaglutide OR thiazolidinedione OR pioglitazone OR rivoglitazone OR rosiglitazone OR lobe-glitazone OR "Hypoglycemic Agents")) AND ALL= ("randomized controlled trial" OR "controlled clinical trial" OR "randomized" OR "randomly") NOT ALL= (animals OR (animal NOT (human OR humans))))).</p> <p>*Data pool : Web of Science Core Collection.<br/>*Search field : TS (=TOPIC) Search (title, abstract, keywords and keywords Plus).</p>                        | <p>'placebo'/exp OR 'placebo' OR 'antidiabetic agent'/exp OR 'antidiabetes drug' OR 'antidiabetic' OR 'antidiabetic agent' OR 'antidiabetic agents' OR 'antidiabetic drug' OR 'antidiabetics' OR 'hypoglycaemic' OR 'hypoglycaemic agent' OR 'hypoglycaemic agents' OR 'hypoglycaemic compound' OR 'hypoglycaemic drug' OR 'hypoglycaemising sulfonamide' OR 'hypoglycemic' OR 'hypoglycemic agent' OR 'hypoglycemic agents' OR 'hypoglycemic drug' OR 'hypoglycemicizing sulfonamide' OR 'hypoglycemizing agent'</p> <p>#4<br/>'nonalcoholic fatty liver disease activity score'/exp OR 'na-flid activity score' OR 'nafld activity score' OR 'nonalcoholic fatty liver disease activity score' OR 'non alcoholic fatty liver disease activity score' OR 'nafld fibrosis score'/exp OR 'nafld fibrosis score' OR 'nafld fibrosis scoring (nafld-fs or nfs)' OR 'nafld fibrosis score (nafld-fs)' OR 'nafld-fs index' OR 'nafld-fs score' OR 'non-alcoholic fatty liver disease fibrosis score' OR 'non-alcoholic liver fatty liver disease-fibrotic score (nafld-fs)' OR 'nonalcoholic fatty liver disease fibrosis score' OR 'fibrosis index (nafld fs)' OR 'non-alcoholic fatty liver disease (nafld) fibrosis score' OR 'nonalcoholic fatty liver disease (nafld) fibrosis score' OR 'nonalcoholic fatty liver disease fibrosis score (nafld-fs)' OR 'nonalcoholic fatty liver fibrosis score' OR 'alanine aminotransferase'/exp OR 'gpt' OR 'alanin aminotransferase' OR 'alanine 2 oxoglutarate aminotransferase' OR 'alanine 2 oxoisovalerate aminotransferase' OR 'alanine alpha ketoglutarate transaminase' OR 'alanine alpha oxoglutarate transaminase' OR 'alanine amino transferase' OR 'alanine aminotransferase' OR 'alanine transaminase' OR 'alanine transpeptidase' OR 'alanine:2 oxoglutarate aminotransferase' OR 'e.c. 2.6.1.2' OR 'glutamate alanine transaminase' OR 'glutamate pyruvate aminotransferase' OR 'glutamate pyruvate transaminase' OR 'glutamate pyruvate:transaminase' OR 'glutamate pyruvate alanine aminotransferase' OR 'glutamate pyruvate transaminase' OR 'glutamic pyruvic aminotransferase' OR 'glutamic pyruvic transaminase' OR 'glutamopyruvic transaminase' OR '1 alanine 2 oxoglutarate aminotransferase' OR '1 alanine:2 oxoglutarate aminotransferase' OR 'aspartate aminotransferase'/exp OR '1 aspartate 2 oxoglutarate aminotransferase' OR '1 aspartate:2 oxoglutarate aminotransferase' OR 'got' OR 'aminotransferase, aspartate' OR 'aspartate amino transferase' OR 'aspartate aminotransferase' OR 'aspartate aminotransferases' OR 'aspartate transaminase' OR 'aspartic aminotransferase' OR 'aspartic transaminase' OR 'e.c. 2.6.1.1' OR 'glutamate aspartate transaminase' OR 'glutamate oxalacetate transaminase' OR 'glutamate oxalacetic transaminase' OR 'glutamate oxalate transaminase' OR 'glutamate oxaloacetate transaminase' OR 'glutamate oxaloacetic acid transaminase' OR 'glutamatoxalacetate transaminase' OR 'glutamic aspartic aminotransferase'</p> |
| <p>#4<br/>TITLE-ABS-KEY ( ( ( ( "non-alcoholic" OR "non alcoholic" OR nonalcoholic) AND ( fatty OR steato* ) ) OR ( nafld OR nafld OR nash OR fibrosis ) OR ( "Non-alcoholic Fatty Liver Disease" ) ) AND ( "glucagon like peptide 1 receptor agonist" OR "GLP-1 receptor agonist" OR albiglutide OR dulaglutide OR liraglutide OR lixisenatide OR exenatide OR semaglutide OR rivoglitazone OR rosiglitazone OR lobe-glitazone OR rivoglitazone ) AND ( "randomized controlled trial" OR "controlled clinical trial" OR "randomized" OR "randomly" ) ) AND NOT ( animals OR ( animal AND NOT ( human OR humans ) ) ) AND ( LIMIT-TO ( DOCTYPE, "ar" ) ) AND ( LIMIT-TO ( SUBAREA , "MED" ) ) AND ( LIMIT-TO ( LANGUAGE , "English" ) ) .</p> <p>*Search field : TITLE-ABS-KEY (title, abstract and keywords).</p> | <p>'nonalcoholic fatty liver disease' OR 'nafld (nonalcoholic fatty liver disease)' OR 'non alcoholic fatty liver disease' OR 'non alcoholic hepato-steatosis' OR 'non alcoholic hepatosteatosis' OR 'non alcoholic liver steatosis' OR 'non-alcoholic fatty liver' OR 'non-alcoholic fld' OR 'non-alcoholic fatty liver' OR 'non-alcoholic fatty liver disease' OR 'non-alcoholic hepatic steatosis' OR 'nonalcoholic fld' OR 'nonalcoholic fatty liver' OR 'nonalcoholic fatty liver disease' OR 'nonalcoholic hepatic steatosis' OR 'nonalcoholic hepatosteatosis' OR 'nonalcoholic liver steatosis'</p>                                                                                                                                                                                                                                                                                                                                                                                                                                                                                                                                                                                                                                                                                                                                                                                                                                                                                                                                                                                                                                                                                                                                                                                                                                                                                                                                                                                                                                                                                                                                                                                                                                                                                                                                                                                                                                                                                                                                                                                                                                                                                                                                                                                                                                                                                                                                                                                                                          |

OR 'glutamic aspartic transaminase' OR 'glutamic oxalacetate transaminase' OR 'glutamic oxalacetic acid transaminase' OR 'glutamic oxalacetic transaminase' OR 'glutamic oxalacetic transferase' OR 'glutamic oxalic transaminase' OR 'glutamic oxaloacetic acid transaminase' OR 'glutamic oxaloacetic aminotransferase' OR 'glutamic oxaloacetic transaminase' OR 'glutamine oxaloacetic transaminase' OR 'glutaminic oxalacetic transaminase' OR '1 aspartate 2 oxoglutarate transaminase' OR '1 aspartate 2 oxoglutarate aminotransferase' OR '1 aspartate 2 oxoglutarate aminotransferase' OR '1 aspartate:2 oxoglutarate transaminase' OR '1 aspartate:2 oxoglutarate aminotransferase' OR 'levo aspartate aminotransferase' OR 'transaminase a' OR 'gamma glutamyltransferase'/exp OR '(5 glutamyl) peptide:amino acid 5 glutamyltransferase' OR '4 glutamyl transferase' OR 'alpha glutamyltransferase' OR 'e.c.2.3.2.2' OR 'gamma glutamyl transferase' OR 'gamma glutamyl transferase' OR 'gamma glutamyltransferase' OR 'gamma glutamyltransferase' OR 'gamma glutamyltransferase' OR 'glutamyltransferase' OR 'glutamate transpeptidase' OR 'glutamic transferase' OR 'glutamyl transferase' OR 'glutamyl transferase' OR 'glutamyltransferase' OR 'therapy/exp OR efficacy, therapeutic' OR 'therapeutic efficacy' OR 'treatment effectiveness' OR 'treatment efficacy'

#5

((controlled clinical trial)/lim OR [randomized controlled trial]/lim)

#6

[article]/lim

#7

[humans]/lim

#8

[english]/lim

#9

[clinical study]/lim

#1 AND #2 AND #3 AND #4 AND #5 AND #6 AND #7 AND #8 AND #9
